# Supplementary material for: Dynamic changes in LINC00458/HBL1 lncRNA expression during hiPSC differentiation to cardiomyocytes
Source: PubMed Central journal article supplement (PMC10761834; doi:10.1038/s41598-023-49753-3), 2024-01-02
Supplement: 41598_2023_49753_MOESM1_ESM.pdf [file 41598_2023_49753_MOESM1_ESM.pdf]

## SUPPLEMENTARY INFORMATION

### **Dynamic changes in *LINC00458/HBL1* lncRNA expression during hiPSC differentiation to cardiomyocytes**

Patrycja Maciak<sup>#,1</sup>, Agnieszka Suder<sup>#,2,3</sup>, Jakub Wadas<sup>2,3</sup>, Faith Aronimo<sup>1</sup>, Paolo Maiuri<sup>4</sup>, Michał Bochenek<sup>1</sup>, Krzysztof Pyrc<sup>2</sup>, Anna Kula-Pacurar<sup>\*,2</sup>, Marta Pabis<sup>\*,1</sup>

# Equal contribution

#### *Affiliations:*

<sup>1</sup> Malopolska Centre of Biotechnology, Jagiellonian University, Gronostajowa 7A, 30-387 Cracow, Poland.

<sup>2</sup> Virogenetics Laboratory of Virology, Malopolska Centre of Biotechnology, Jagiellonian University, Gronostajowa 7A, 30-387 Cracow, Poland.

<sup>3</sup> Doctoral School of Exact and Natural Sciences, Jagiellonian University, Lojasiewicza 11, 30-348, Cracow, Poland

<sup>4</sup> Department of Molecular Medicine and Medical Biotechnology, University of Naples Federico II, Naples, Italy.

\* Correspondence to: Marta Pabis; email: [marta.pabis@uj.edu.pl](mailto:marta.pabis@uj.edu.pl); Anna Kula-Pacurar; e-mail: [anna.kula-pacurar@uj.edu.pl](mailto:anna.kula-pacurar@uj.edu.pl)

**Supplementary Table S1.** Primers used in this study

| <b>Target</b>       | <b>Forward</b>           | <b>Reverse</b>            |
|---------------------|--------------------------|---------------------------|
| <i>GAPDH</i><br>1+2 | GTGGACCTGACCTGCCGTCT     | GGAGGAGTGGGTGTCGCTGT      |
| <i>RPS29</i> 1+2    | AATATGTGCCGCCAGTGTTT     | CCCGGATAATCCTCTGAAGG      |
| <i>18S</i> 1+2      | TTGTTGGTTTTTCGGAACCTGAG  | GCAAATGCTTTCGCTCTGGTC     |
| <i>5.8 S</i> 1+2    | CGACTCTTAGCGGTGGATCA     | GGGCCGCAAGTGC GTTCGAA     |
| <i>5S</i> 1+2       | GTCTACGGCCATAACCACCCT    | AAAGCCTACAGCACCCGGTA      |
| <i>NANOG</i>        | TGAACCTCAGCTACAAACAGGTG  | AACTGCATGCAGGACTGCAGAG    |
| <i>TBXT</i> 3+4     | CAAATCCTCATCCTCAGTTTG    | GTCAGAATAGGTTGGAGAATTG    |
| <i>TNNT2</i> 1+2    | GGCAGCTCCTGTTTGAAATG     | TTATTACTGGTGTGGAGTGGGTGTG |
| <i>HBL1</i> 1 1+2   | GGTTGTGGTAATGAGCTGGGA    | TATGCTCTGCAGCCACTAGAC     |
| <i>HBL1</i> 1 3+4   | GCAGTCCTACACCTTGCCTT     | TGGGAGTTGCAGGTGATGTC      |
| <i>HBL1</i> 1 7+8   | TGCACATTTTGAGGGGATAATTGG | GAAGGAACAAAGACACACTGCT    |
| <i>ESI</i> 1+2      | AGCAGAGACAGAATGAGCAATG   | GCCGCAGATAAGCAAAATGAC     |
| <i>ESI</i> 3+4      | TGTTGGGAGCATTCTTTTTCTT   | GCAGCATCTTTGTTGAGGTGTG    |
| <i>ES3</i> 1+2      | AAGACTGACACTGCCCAATCG    | GCTGTAGGAAGGTTGTGAGATG    |
| <i>ES3</i> 3+4      | ACTGTGAGAACTCAAAGGGGG    | ACGCCAACTAAGCAGACGTA      |
| <i>ES3</i> 5+6      | CAACATGAGTCATTGGGGCA     | AATCTGTCTTTGTGGCAGGC      |
| <i>ES3</i> 7+8      | GGACTTTTTCTTCTGGACTGAAC  | ACTTGCTGTAGGAAGGTTGTGA    |
| <i>ES3_0</i>        | GCCCAAGGAACATCTCACCA     |                           |

**Supplementary Table S2.** Reagents used in this study

| <b>Reagent</b>                            | <b>Source</b>               | <b>Identifier</b> |
|-------------------------------------------|-----------------------------|-------------------|
| hiPSC                                     | Reprocell                   | Cat # RCRP005N    |
| rhVTN-N                                   | Thermo Fischer Scientific   | Cat # A31804      |
| Essential 8™ Flex medium                  | Thermo Fischer Scientific   | Cat # A2858501    |
| RPMI 1640                                 | Thermo Fischer Scientific   | Cat # 11875       |
| L-ascorbic acid 2-phosphate               | Sigma-Aldrich               | Cat # A8960       |
| Albumin Human, Recombinant                | Sigma-Aldrich               | Cat # A9731       |
| CHIR99021                                 | Selleckchem                 | Cat # S1263       |
| IWR1                                      | Sigma-Aldrich               | Cat # I0161       |
| B-27 supplement                           | Thermo Fischer Scientific   | Cat # 17504-044   |
| TRIzol                                    | Thermo Fischer Scientific   | Cat # 15596026    |
| TURBO™ DNase                              | Thermo Fischer Scientific   | Cat # AM2238      |
| NG dART RT kit                            | EURx                        | Cat # E0801-02    |
| SG qPCR Master Mix                        | EURx                        | Cat # E0402-03    |
| PMSF Solution (0,1 M in Ethanol)          | Sigma-Aldrich               | Cat # 93482       |
| Pierce™ BCA Protein Assay Kit             | Thermo Fischer Scientific   | Cat # 23225       |
| Formaldehyde solution                     | Sigma-Aldrich               | Cat # F8775       |
| Triton X-100                              | Sigma-Aldrich               | Cat # T8787       |
| ProLong™ Gold Antifade Mountant with DAPI | Thermo Fischer Scientific   | Cat # P36941      |
| GeneJET Gel Extraction Kit                | Thermo Fischer Scientific   | Cat # K0691       |
| TrypLE™ Select Enzyme                     | Thermo Fischer Scientific   | Cat # 12563029    |
| ECMatrix™-511 Silk E8 Laminin             | Sigma-Aldrich               | Cat # CC161       |
| Magna RIP® RNA-Binding Protein IP Kit     | Sigma-Aldrich               | Cat # 17-700      |
| Venor®GeM qEP                             | Minerva Biolabs             | Cat # 11-9025     |
| GeneRuler 1 kb Plus DNA Ladder            | Thermo Fischer Scientific   | Cat # SM1331      |
| HCR Probe Hybridization Buffer            | Molecular Instruments, Inc. | Cat # BPH03821    |
| HCR Probe Wash Buffer                     | Molecular Instruments, Inc. | Cat # BPW01522    |
| HCR Amplification Buffer                  | Molecular Instruments, Inc. | Cat # BAM01522    |
| HCR amplifier B1-h1 AF 647                | Molecular Instruments, Inc. | Cat # S013922     |
| HCR amplifier B1-h2 AF 647                | Molecular Instruments, Inc. | Cat # S012522     |
|                                           |                             |                   |
| <b>Antibodies</b>                         | <b>Source</b>               | <b>Identifier</b> |
| anti-SOX2 (rabbit)                        | Abcam                       | Cat # ab97959     |
| anti-TNNT2 (mouse IgG1)                   | Thermo Fischer Scientific   | Cat # MA5-12960   |
| anti-MYL7 (mouse IgG2b)                   | Synaptic Systems            | Cat # 311011      |
| anti-rabbit IgG, Alexa 647 (donkey)       | Jackson Laboratories        | Cat # 711-606-152 |
| anti-mouse IgG2b, Alexa 647 (goat)        | Thermo Fischer Scientific   | Cat # A-21242     |
| anti-mouse IgG1, Alexa 488 (goat)         | Thermo Fischer Scientific   | Cat # A-21121     |
| Mouse IgG1 Isotype Control                | Thermo Fischer Scientific   | Cat # MA1-10406   |
| Mouse IgG2b Isotype Control               | Thermo Fischer Scientific   | Cat # MA1-10427   |
| anti-YB-1 (rabbit)                        | Sigma-Aldrich               | Cat # Y0396       |
| anti-rabbit IgG, Alexa 594 (goat)         | Thermo Fischer Scientific   | Cat # A-11012     |

**Supplementary Table S3.** *HBL1* FISH probes used in this study

|           |                                                       |
|-----------|-------------------------------------------------------|
| <b>1</b>  | ACACTGCCAAGTCTCCCTAATGTCAACAAGGCTAGCAGTCATTCTGGGCCA   |
| <b>2</b>  | TTGTTTGCTTGAATTACCTCTTTGGGACGTGAGGAATTTACACTAAAACACC  |
| <b>3</b>  | TTTCTTTACAGAAAAGATACTAGCGCCAGTCTGGCAGGGGCCTTTTCTAGTC  |
| <b>4</b>  | TGCCCTAACATGGAGTCCAAATTCGTTAGCATGGTTTAAGAGTCTCTTCAT   |
| <b>5</b>  | GACCACAAAACCACAGTCCAGATTGTAGGAGGCTTGGGTTGTGGTAATGAGC  |
| <b>6</b>  | CTGCATCAATCAGGACATCAGTGTTACTGATTTGCGAGACTAGGGAATTAGG  |
| <b>7</b>  | TCATCATTACTAAGCAGTCCTATGTTAATAGCCCTTTGGGTCTAGAGCT     |
| <b>8</b>  | AATTATGCGCTATACCTTGTACTIONGAAAGAACTATATCCTGACTAGTCCAG |
| <b>9</b>  | AAGCTACCTGGACTTCAATATTACTCTTGTGACCCGAATTATCTTATTTAGT  |
| <b>10</b> | TTTTCTTGTTTGGTGCAAGTCAGTCTCTGGAAGGTGGAAGTGTTTTGTTCTC  |
| <b>11</b> | TAATACCTGCCTTCAAGAACTAACTCTCAAGGCTGCTGTATGGAAATCCTG   |
| <b>12</b> | GGACTTCTCTGCTGGCTATCAGGAGTCCTCATCTATGATCTGCTAGAAGAAT  |
| <b>13</b> | GTTCTTGATGAAAGTGAGCAAAGGAATTTTGCAGAGATCAGAGTAGAACTTT  |
| <b>14</b> | CAGCCTCCTGAAGCCTGGCAAGGGTGCCTTAGTGAGGACATCACCTGCAACT  |
| <b>15</b> | TCCTAACTAGATTGCACTCTTCTAAATGCTGTACTACTGCTATACACATTCT  |
| <b>16</b> | CATGTGTACGTCTTTCCATTCTGCATCCCAGGGGATTGCAGCCATCAGCTC   |
| <b>17</b> | CCAAGAAAGGTCCCCTTCTAGCAACTGTGCATCCTTCCAGCTGCCTTATCA   |
| <b>18</b> | TTGCATCTCTGGGATTTTTGCCATAGGCTTTTCTGTACTGTTTGCATTTCT   |
| <b>19</b> | AAGCACGCTGAGCAGTCCTACACCTTGCCTTCTGAGAGAGAAGAGGACAGTC  |
| <b>20</b> | GCAAATACTGTGAACGCTGTCACACTAGCACAAAGCCTTTGCAAAAATTTCC  |

## Supplementary figures and figure legends

### SUPPLEMENTARY FIGURE S1

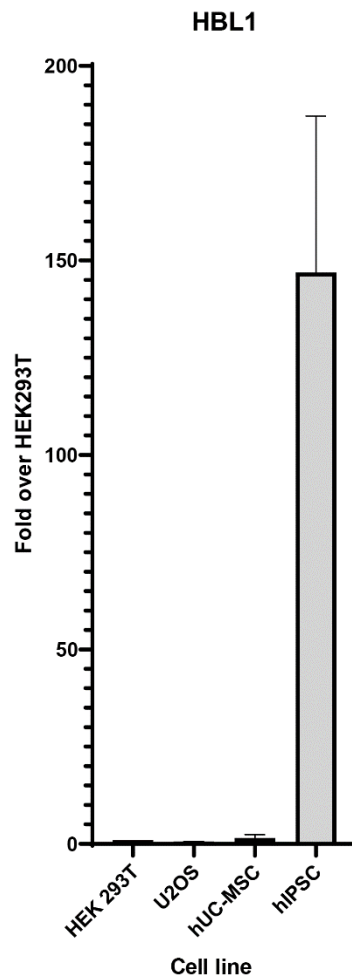

**SUPPLEMENTARY FIGURE S1.** Relative expression levels of *HBL1* in selected human cell lines. RNA from HEK 293T, U2OS, hUC-MSC and hiPSC was isolated, DNase-treated and subjected to RT-qPCR analysis with primers amplifying an amplicon within *HBL1* (primers 1+2). Data are shown as mean  $\pm$  standard deviation (n = 2).

SUPPLEMENTARY FIGURE S2

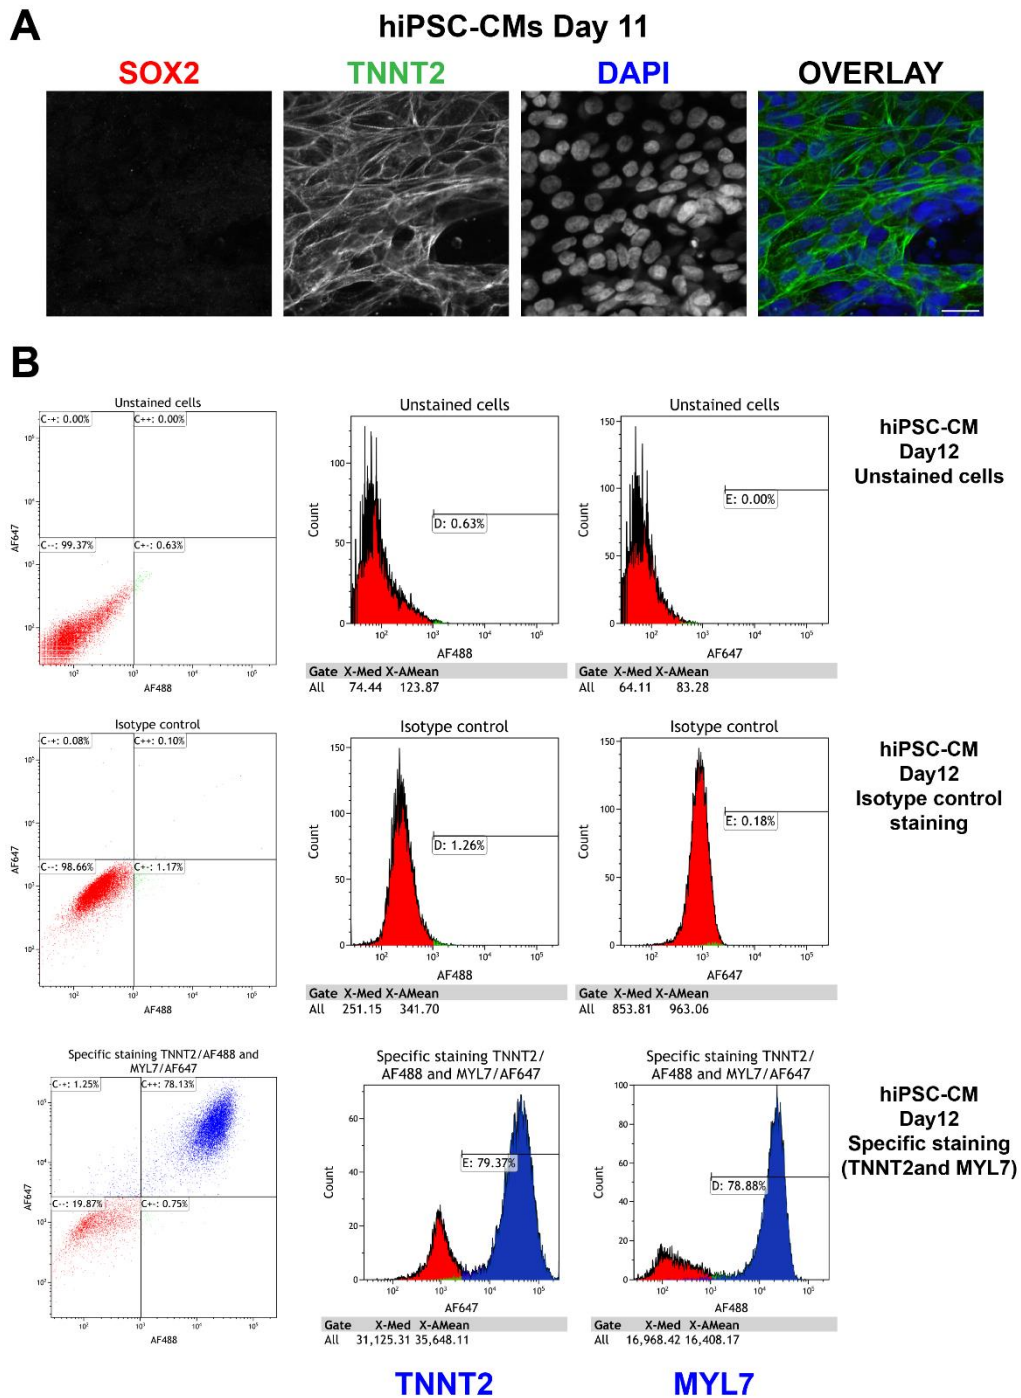

**SUPPLEMENTARY FIGURE S2.** Validation of hiPSC differentiation towards cardiomyocytes. Cells at selected points of differentiation were analysed regarding the presence of expected cardiomyocyte markers using confocal microscopy (A) and flow cytometry (B). (A) Cells were fixed, permeabilized and immunofluorescence staining was performed to visualize both a markers of pluripotency (SOX2) and of cardiomyocytes (TNNT2). Scale bar, 20  $\mu$ m. (B) Cells were dissociated, fixed, permeabilized and stained for flow cytometry using anti-TNNT2/AF488 and anti-MYL7/AF647 antibodies. Unstained cells and adequate isotype controls were included in the analysis.

SUPPLEMENTARY FIGURE S3

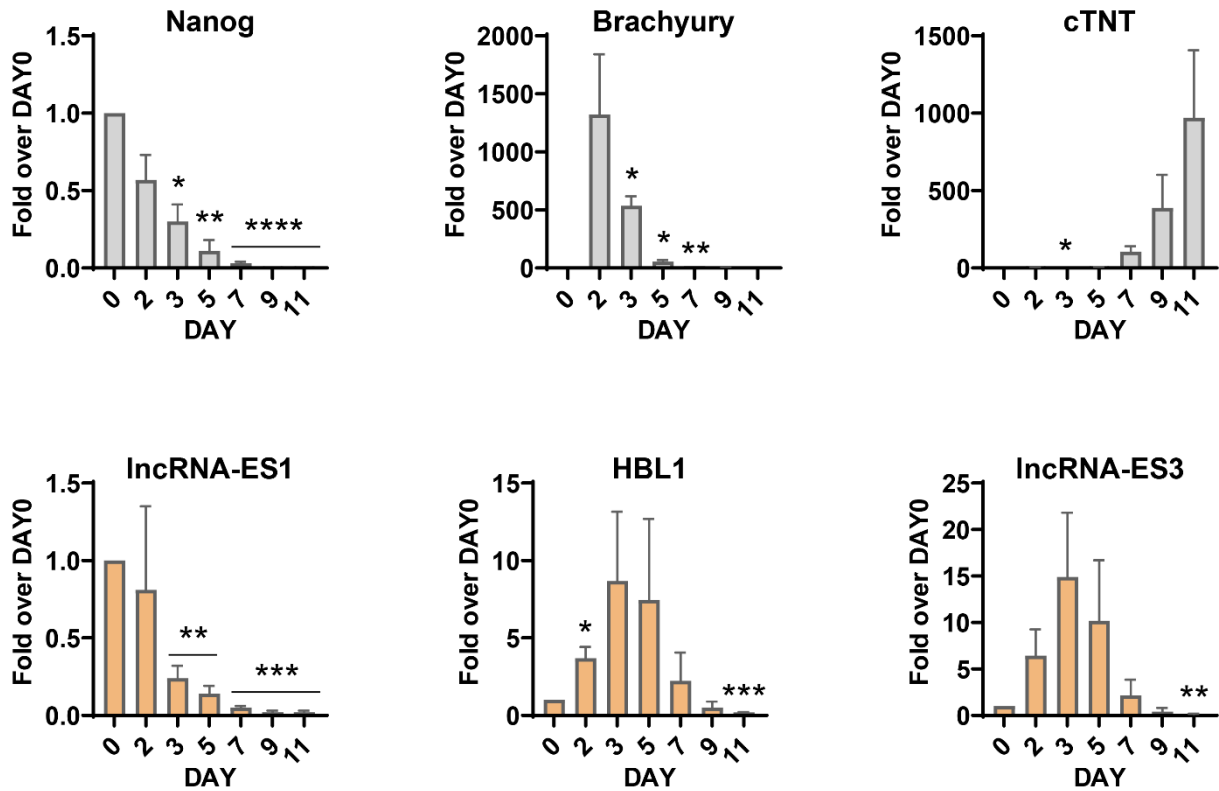

**SUPPLEMENTARY FIGURE S3.** Expression pattern of selected transcripts during differentiation of hiPSC (reprogrammed from PBMC) towards cardiomyocytes. RNA was purified from cells at indicated timepoints and subjected to RT-qPCR analysis with primers amplifying markers of pluripotency (*NANOG*), mesoderm (*TBXT*) and cardiomyocytes (*TNNT2*), as well as selected lncRNAs. Data are shown as the mean  $\pm$  standard deviation (n = 3). \* p < 0.05, \*\* p < 0.01, \*\*\* p < 0.001, \*\*\*\* p < 0.0001, Student's t-test, two-tailed, paired.

**SUPPLEMENTARY FIGURE S4**

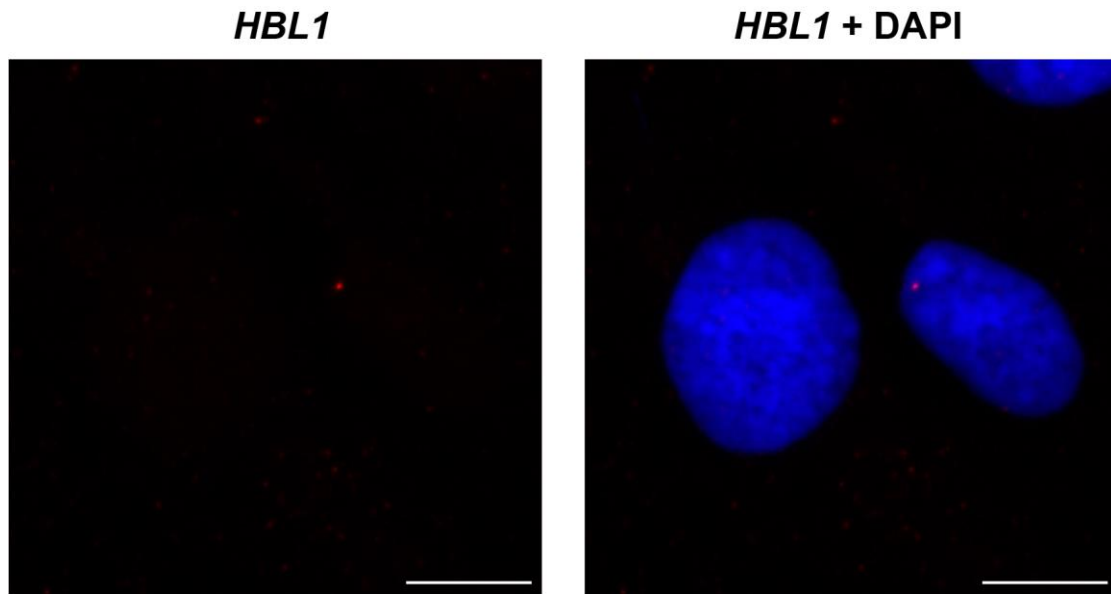

**SUPPLEMENTARY FIGURE S4.** hiPSC-derived endothelial cells were subjected to RNA FISH against *HBL1* lncRNA (left panel). Nuclei were stained with DAPI (in blue, right panel). Scale bar = 10  $\mu$ m



## SUPPLEMENTARY FIGURE S5

ACACTGCCAAGTCTCCCTAATGTCAACAAGGCTAGCAGTCATTCTGGGCCAAATTTGTCCCCTTC  
CTGAAGCAATGTCTGAAGCTGAACAGGAGTCACTCCCAGCATCTCCCAGTCCTTGTGTGCCAC  
GTGGATAAAGAAGATACAGTCCCATGACTGGCTAGCTTGAAGATGCCAACAGGTCTCAATTGTCT  
TGACTTGGTTTATGACAAACCCAGCCTAAGGTTGCCATCTAAAAATGGAGACATGGCCGGACTCAT  
CTTTCTCAAGCTACCTGGACTTCAATATTACTTGTGACCCGAATTATCTTATTTAGTTCTTTTCTTG  
TTTGGTGCAAGTCAGCTCCTGGAAGGTGGAAGTGTGTTTCTCCATTGCATCTCCTGGGATTTTT  
GCCATAGGCTTTTCTGTACTGTTTGCATTTCTGGTTGTTTCTTGAATTACCTCTTTGGGACGTGAG  
GAATTTACACTAAAACACCTGTTTCTTTACAGAAAAGATACTAGCGCCAGTCTGGCAGGGGCCTTT  
TCTAGTCTCAAGCACGCTGAGCAGTCTACACCTTGCCTTCTGAGAGAGAAGAGGACAGTCCCTCA  
GCCTCCTGAAGCCTGGCAAGGGTGCCTTAGTGAGGACATCACCTGCAACTCCCAGATGGATAGAC  
GAGGCCATGGAGAGAGGAGAACACCAACCCATGAGTGACAAGTG**CCTGTCA**ATTGTCAATGATGCT  
GCAAGCACACGATGCCCTTCTTAGCAGGGACCCAGTGGCCCTTACCAGCTTCATTATTTCTAG  
GCATGATCGCAT**CCTGTCT**CCCATTTTGTAAAATTCTATCTAGAGAAAAGAGCTCATTTTGTAGCTAA  
AAAAAAAAAAATCCTGTTTATCTGCTAAAAATCACATAAAATAACTATTGGACTGTTTGAATGGC  
GTGGCCTCT**GCTCTGA**CTTATAACTGTGATCTTGACTAAGTTAAGCAGTCACTCTGACCTTACGTT  
ACTCCCTCAAATTTGAATAAAAAATAGCAACTTCTCTACTTATAAATTACTTCTAAAAATTAGATTCTT  
GAGATTCAAAGATAGGTAATA**CCTGCCT**TCAAGAACTAACTCTCAAGGCTGCTGTATGGAAATCCT  
GCCTCCTAACTAGATTGCACTCTTCTAAATGCTGTACTACTGCTATACACATTCTCCAAATCAAGTTA  
ATTTCAAAGTCTTGCTGAATCTACTTTTTAGAAATATCTAAGTCATGTGTACGTCTTTCCATTCTGC  
ATCCCAGGGGATTGCAGCCATCAGCTCACCTCCTCCTAATCCAAATGTTCTAACTGGTCT**CC**  
**TGCCT**TGCCTTTCTCCTGATCACTTCTACAACAGAGTGATCGTGACTTGAATGCAAATTATATTG  
TATGAGTTATCTCCCAAAACATTCAAGCTGCCTA**GCTCCCT**TAACATGAAGTCCAAATTGCCCTAAC  
ATGGAGTCCAAATTTCTTAGCATGGTTAAGAGTCTTTCATGAACAAAAGGCTTCTGTCTTCTCC  
AGTCATACCCAAATCTTTCCTAATCAAAGCCATTTTATCAGTTAAGAACAGAGACAGTTGTTCCA  
GATATAAGGAAGAGCATTGGCAAAGTTGCAGATAATAATTTAGGTGAGTGTGATTGAGAGATCTCAT  
TAGTGATGCCTCAGAATGACTAGGAGACATGGATAAAAGGATAACAAGAAAAGAAAAGGAGACCACA  
AAACCACAGTCCAGATTGTAGGAGGCTTGGGTTGTGGTAATGAGCTGGGACTTCTCTGCTGGCTA  
TCAGGAGTCTCATCTATGATCTGCTAGAAGAATATCATGATTAGAAGTGCATTTTAGAAAGTTAAGT  
CTAGTGGCTGCAGAGCATAATAGAAAGGTAGAGCTTTGAGTCCACAAGAACATTATGGTTAATA  
AAACTCTGTGAGAGAGATTAGAGCACAACAAAGGCAGTCATAATGGAAATGGAAAGAAAAGTTAAA  
GGCTAAAGACTCCAGAGACATTTTAAAAATGTGGGAAATTAGGAGAGGAGCTGCATCAATCAGG  
ACATCAGTGTTACTGATTTGCGAGACTAGGGAATTAGGATGTTCTTGATGAAAGTGAGCAAAGGAA  
TTTTGCAGAGATCAGAGTAGAACTTTTTTTTTCCCTGAAAGCATTCTGAAAAGTAAACACCCTA  
CTGCATAAGATATCATCATCATTACTAAGCAGTCTATGTTAATAGCCCTTTGGGTCTAGAGCTT  
GAATTATGCGCTATACCTTGTACTTGAAAGAACTATATCCTGACTAGTCCAGATGGATATTACTTAA  
CCTGCTTTAAGATCCTCTAGGGAGGAACAACCACAACAAATCCAAGAAAGGTCCCTTCTTAGCAA  
CTGTGCATCCTTCC**AGTGCCT**TATCAATGATATCATCCCTTCGATATGTTACAGAGTCCATTTGGA  
CAATTTTTAAAGGGACTCATGACATTCTGGTAAAAGAGAATTATGATTTCTGGACTCTTTAAATTC  
AATGTAGGGGGAAAAAAGCAAGTCTTCTGTTTGTATATAAAGCTATAAAGATGCAAAGAGAGAAA  
GGTCCATTCTAGCATTTCATAATATCTGTTTTCACTGAAAACCTGAGCTGACTTTAATCATCTACAC  
TTCAGACTGGGCTAATACCTCAGAAAAGCTGCAATACTGTGAAC**GCTGTCA**CACTAGCACAAAGCC  
TTTGCAAAAATTTCCCAAAATACACAGATTAATAAAGCACATTTTCTCTCTCTGTTTT**CCTCTCTC**  
TCTCTCTCTCTCACACGCACACACACATACACATGCACAAAAATTTGTCAATTAATTGTTAAATTAT  
TTTCATTGTAGGAAAGATAAATCTTTCAATTAATATAGTATTGTTTCATGCTAAAAATGTCTTATCCATT  
AAAAAGATACTCAGTTGTAATAGAGTAGTTCAATCAATACTGGTAAATTGCACATTTTGGGGGATAA  
TTGGTAAATGCAAATCAACTAGAAAAGAAGAGAAAAGCAGTGTGTCTTTGTTCTTCTGT

**SUPPLEMENTARY FIGURE S5.** Sequences corresponding to CU box ( ${}^C/GCU^C/G^C/U^C/G^A/U$ ) are marked in orange on *HBL1* T3 sequence (MF678491).

## SUPPLEMENTARY FIGURE S6

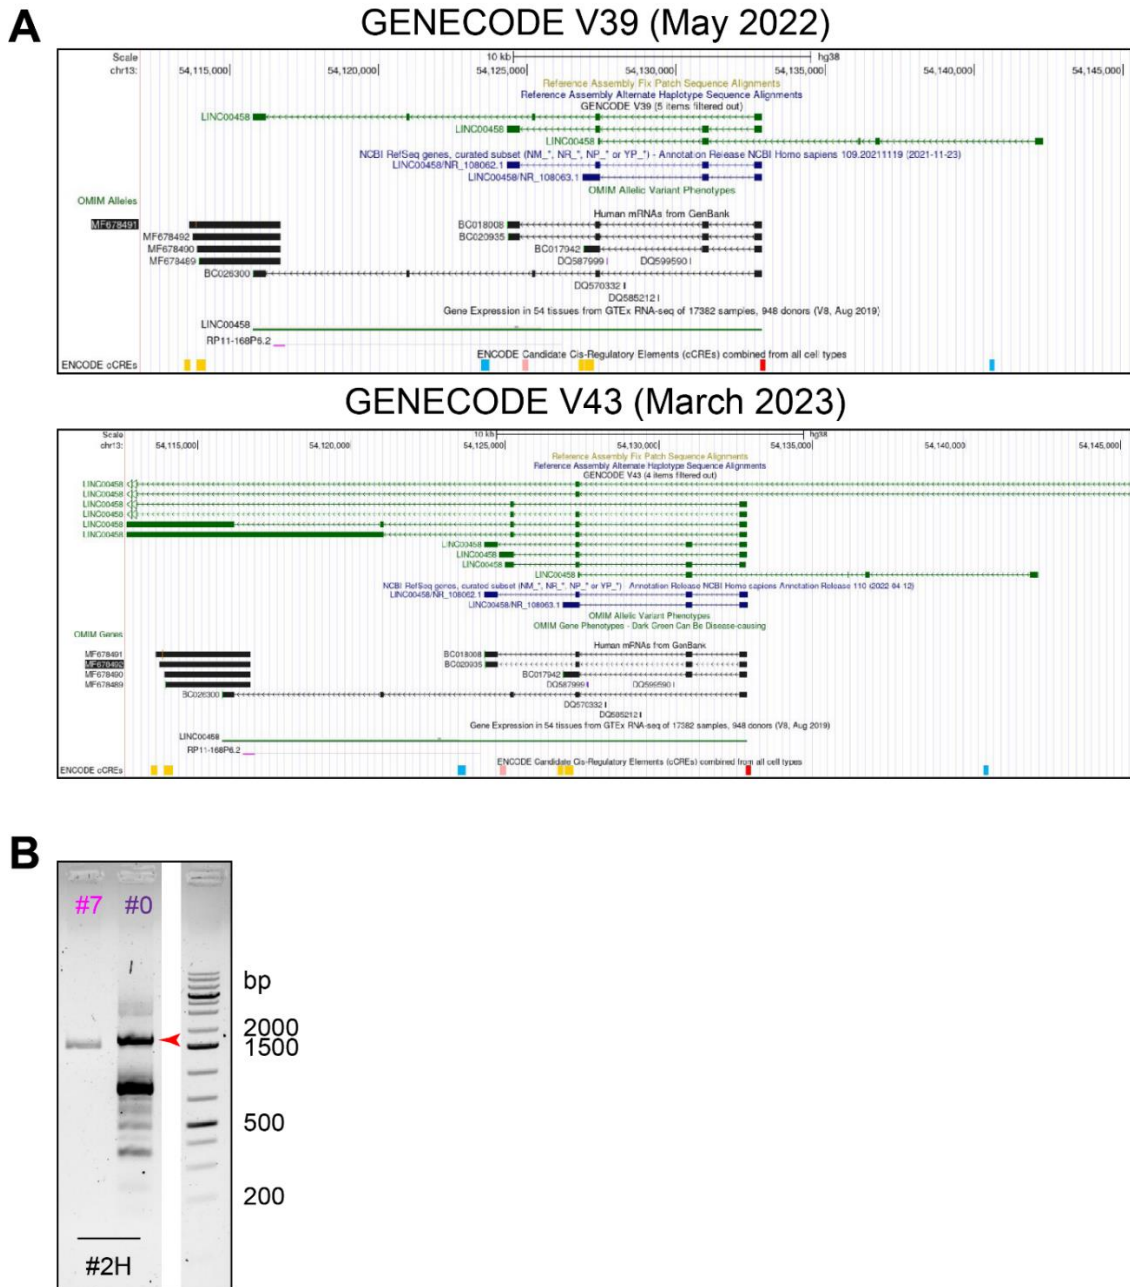

**SUPPLEMENTARY FIGURE S6. (A)** Genomic localization of *LINC00458/HBL1* from public databases. Screen shots from UCSC Genome browser (<https://genome.ucsc.edu>) presenting the information about the genomic locus encompassing *LINC00458* and *HBL1*, as well as the annotated splice isoforms of *LINC00458*. Two GENCODE releases are selected to present the increasing complexity of the locus identified based on annotations relying on long-read data **(B)** RT-PCR products amplified with indicated primers selected such as to detect the presence of amplicons that encompass both *LINC00458* and *HBL1* sequences were separated by electrophoresis. Forward primers are indicated at the top of the gel and reverse primers at the bottom. See Figure 4A for the localization of the primers within the transcripts. The PCR product indicated with the red arrowhead amplified using primer #0 combined with #2H was purified from the gel and subjected to Sanger sequencing. The original raw gel image is presented in Supplementary Fig. S8B.

## SUPPLEMENTARY FIGURE S7

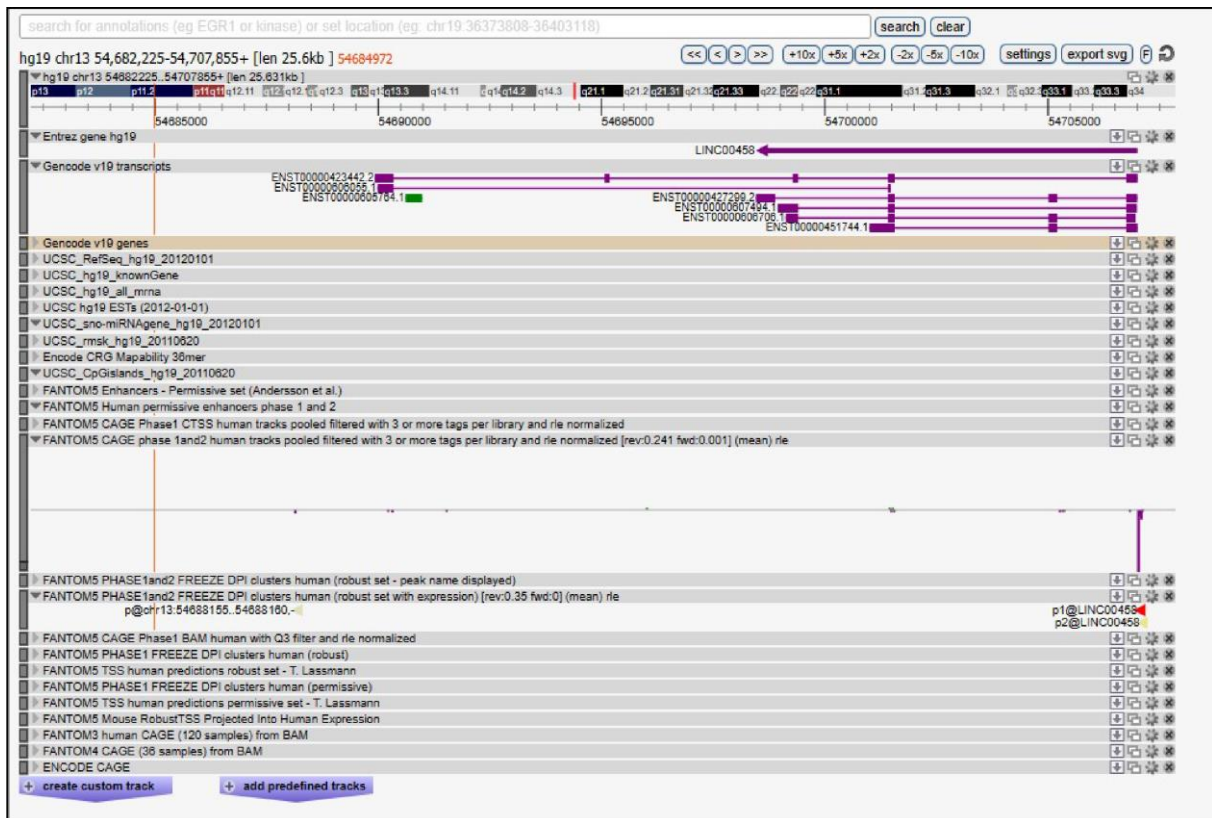

**SUPPLEMENTARY FIGURE S7.** Transcription start site (TSS) of *LINC00458/HBL1*. Screen shot from ZENBU Genome Browser database (<https://fantom.gsc.riken.jp>) presenting *LINC00458* TSS information from FANTOM5 CAGE data.

SUPPLEMENTARY FIGURE S8

**A**

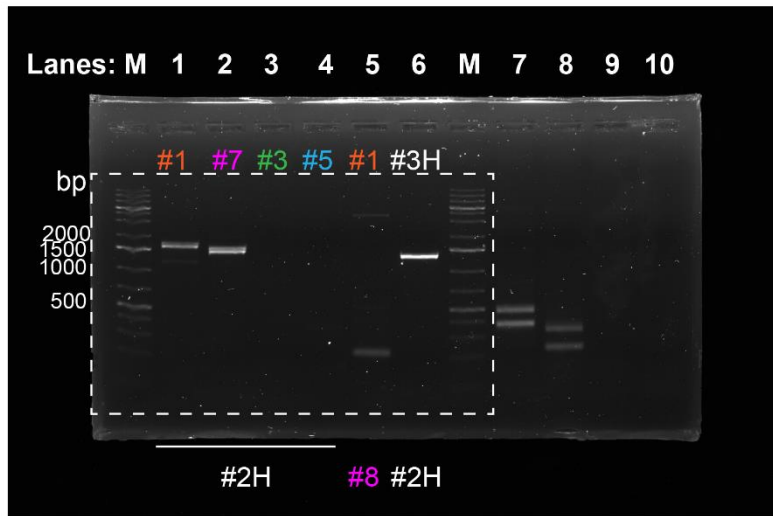

**B**

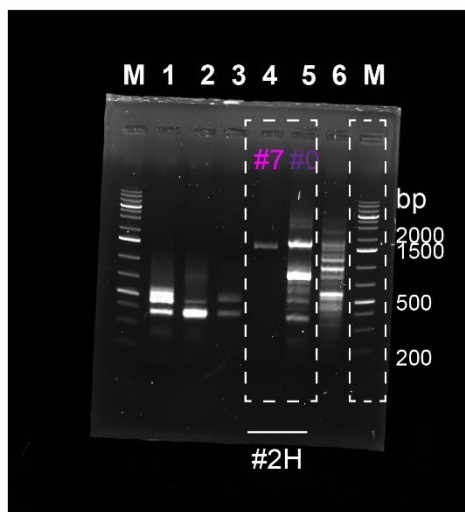

**SUPPLEMENTARY FIGURE S8.** (A) Raw image of the agarose gel presented in Figure 4B. The area delineated by the dashed line is incorporated in Figure 4B. Lanes numbered 7 – 10 are not related to the current manuscript. (B) Raw image of the agarose gel presented in Supplementary Fig. S6B. The areas delineated by the dashed line are incorporated in Supplementary Fig. S6B. Lanes numbered 1 – 3 and 6 are not related to the current manuscript (bp = base pairs; M = marker).
